# Supplementary material for: MALDI-TOF mass spectrometry applied for animal species identification based on bone samples
Source: Royal Society of Chemistry journal article supplement (doi:10.1039/d1an02163j), 2022-01-01
Supplement: d1an02163j1.pdf [file d1an02163j1.pdf]

**Supplementary materials for**

**MALDI-TOF mass spectrometry applied for  
animal species identification based on bone samples**

Xin Zhao, Hongyan Bi\*

College of Food Science and Engineering, Shanghai Ocean University, Hucheng Ring  
Road 999, Pudong New District, 201306 Shanghai, China

\*To whom correspondence should be addressed. Tel.: +86-21-61900364; Fax: +86-21-  
61900365; E-mail address: [hybi@shou.edu.cn](mailto:hybi@shou.edu.cn)

E-mail addresses for the other authors: [zhaoxinorange@qq.com](mailto:zhaoxinorange@qq.com)

## S1. Scientific classification of the animal samples analyzed in the present study

**Table S1.** Scientific classification of the animal samples studied in the present work.

| sample | species                       | classification |               |               |              |
|--------|-------------------------------|----------------|---------------|---------------|--------------|
|        |                               | class          | order         | family        | genus        |
| 1      | <i>L. crocea</i> (LC)         | Actinopteri    | Perciformes   | Sciaenidae    | Larimichthys |
| 2      | <i>L. polyactis</i> (LP)      | Actinopteri    | Perciformes   | Sciaenidae    | Larimichthys |
| 3      | <i>C. alburnus</i> (CA)       | Actinopteri    | Cypriniformes | Cyprinidae    | Culter       |
| 4      | <i>P. leptcephalus</i> (PL)   | Actinopteri    | Cypriniformes | Cyprinidae    | Pseudaspius  |
| 5      | <i>N. virgatus</i> (NV)       | Actinopteri    | Perciformes   | Nemipteridae  | Nemipterus   |
| 6      | <i>D. eleginoides</i> (DE)    | Actinopteri    | Perciformes   | Nototheniidae | Dissostichus |
| 7      | <i>S. s. domestica</i> (SSD)  | Mammalia       | Artiodactyla  | Suidae        | Sus          |
| 8      | <i>G. g. domesticus</i> (GGD) | Aves           | Galliformes   | Phasianidae   | Gallus       |

## S2. Detailed information of the samples studied in the present study

**Table S2.** Size and weight of the animal samples analyzed in the present study. *D. eleginoides* (DE) sample was obtained as slices, and *S. s. domestica* (SSD) and *G. g. domesticus* (GGD) samples were obtained as pieces, the size and weight of the whole samples are not available (N/A). The probable origins of SSD & GGD are also N/A.

| sample | species                       | probable origin    | trader                                                    | biological replicates (samples) | size / cm    | weight / g     |
|--------|-------------------------------|--------------------|-----------------------------------------------------------|---------------------------------|--------------|----------------|
| 1      | <i>L. crocea</i> (LC)         | Ningbo, Zhejiang   | Xianwaixian flagship store                                | 6                               | 23.4<br>±1.5 | 149.2<br>±26.7 |
| 2      | <i>L. polyactis</i> (LP)      | Qingdao, Shandong  | Yulang flagship store                                     | 6                               | 17.6<br>±0.9 | 70.0<br>±6.3   |
| 3      | <i>C. alburnus</i> (CA)       | Hangzhou, Zhejiang | Qiandao Yuxiang                                           | 6                               | 26.6<br>±1.7 | 108.3<br>±19.4 |
| 4      | <i>P. leptcephalus</i> (PL)   | Hangzhou, Zhejiang | Qiandao Yuxiang                                           | 6                               | 34.1<br>±2.0 | 260.0<br>±44.2 |
| 5      | <i>N. virgatus</i> (NV)       | Zhuhai, Guangdong  | The Emperor of the Ship Seafood (Chuan Zhi Huang Seafood) | 6                               | 23.9<br>±1.3 | 146.7<br>±27.1 |
| 6      | <i>D. eleginoides</i> (DE)    | Qingdao, Shandong  | Fishy aroma (Yu Wei Xiang)                                | 3                               | N/A          | N/A            |
| 7      | <i>S. s. domestica</i> (SSD)  | N/A                | Guzong Road, Pudong New Area, Shanghai                    | 3                               | N/A          | N/A            |
| 8      | <i>G. g. domesticus</i> (GGD) | N/A                | Guzong Road, Pudong New Area, Shanghai                    | 3                               | N/A          | N/A            |

### S3. Impact of matrices on mass spectrometric analysis

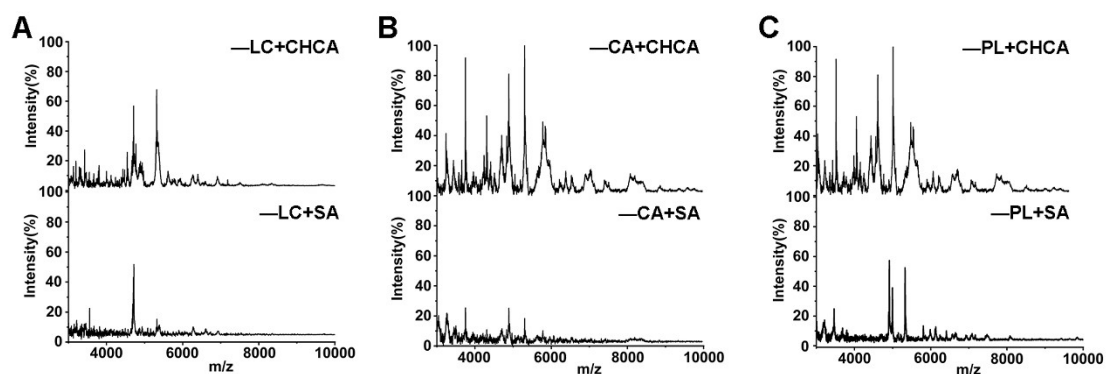

**Fig. S1.** Representative MALDI-TOF mass spectra for processed samples of bones of fish species *Larimichthys crocea* (LC), *Culter alburnus* (CA) and *Pseudaspius leptocephalus* (PL) when using matrix  $\alpha$ -cyano-4-hydroxycinnamic acid (CHCA) and sinapinic acid (SA), respectively. Experimentally, 0.5 g of fish bone sample and 5 mL of 10% (v/v) formic acid (FA) solution in a beaker was boiled on a hot plate for 5.2 min. The obtained extracts were analyzed under the matrix of CHCA and SA, respectively.

**S4. Cross validation (CV) for the mass spectra of fishes belonging to a same order, family and genus, respectively**

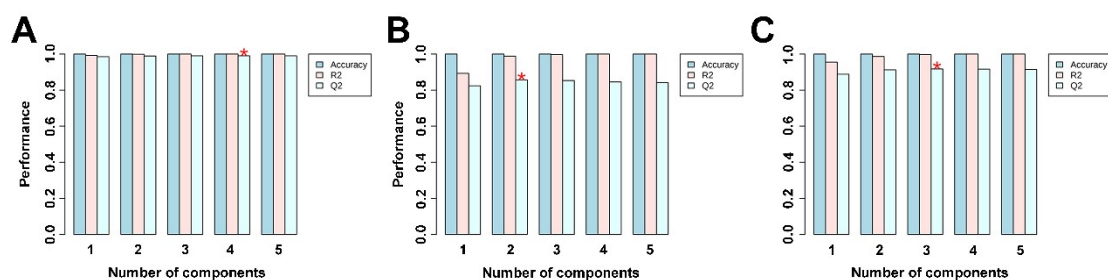

**Fig. S2.** Cross validation (CV) results of the datasets collected from fish species that belong to the same order, family and genus, respectively. Q2 is an estimate of the predictive ability of the model. In each CV plot, the predicted data are compared with the original data, and the sum of squared errors is calculated. The prediction error is then summed over all samples, which is predicted residual sum of squares (short as PRESS). For convenience, the PRESS is divided by the initial sum of squares and subtracted from 1 to resemble the scale of the R2 which provides a measure of model fit to the original data. The analyzed fish samples include: (A) at the order level, *D. eleginoides* (DE) and *N. virgatus* (NV); (B) at the family level, *C. alburnus* (CA) and *P. leptocephalus* (PL); (C) at the genus level, *L. crocea* (LC) and *L. polyactis* (LP).

**Table S3.** The measured R2 and Q2 in Figure S2C.

| measure   | 1comps | 2comps | 3comps | 4comps | 5comps | average (avg) | RSD  |
|-----------|--------|--------|--------|--------|--------|---------------|------|
| <b>R2</b> | 0.9549 | 0.9867 | 0.9975 | 0.9996 | 0.9999 | 0.988±0.019   | 1.9% |
| <b>Q2</b> | 0.8883 | 0.9128 | 0.9177 | 0.9164 | 0.9147 | 0.910±0.012   | 1.3% |

## S5. Mass spectral data for each animal sample

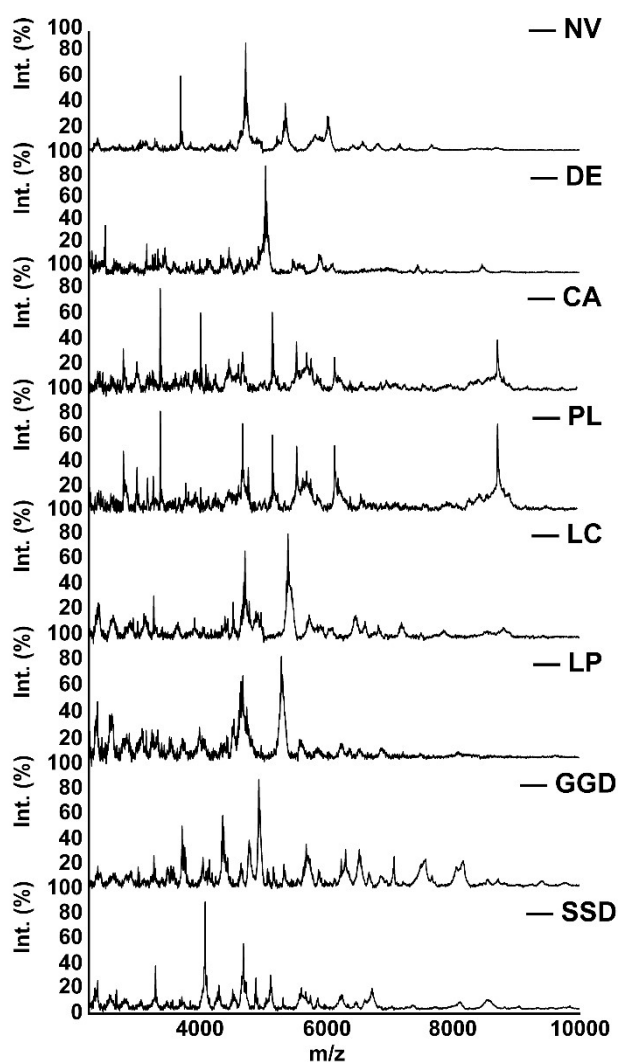

**Fig. S3.** Representative MALDI-TOF mass spectra of analyzed species. Bone sample of *Larimichthys crocea* (LC), *Larimichthys polyactis* (LP), *Culter alburnus* (CA), *Pseudaspius leptcephalus* (PL), *Nemipterus virgatus* (NV), *Dissostichus Eleginoides* (DE), *Sus scrofa domestica* (SSD) and *Gallus gallus domesticus* (GGD) were treated and analyzed. The bone extracts of the samples were analyzed by MALDI-TOF MS. Nine mass spectra were usually obtained for each species.
